# Supplementary material for: The Yeast Magmas Ortholog Pam16 Has an Essential Function in Fermentative Growth That Involves Sphingolipid Metabolism
Source: PLoS One. 2012 Jul 10;7(7):e39428. doi: 10.1371/journal.pone.0039428 (PMC3393719; doi:10.1371/journal.pone.0039428)
Supplement: Table S1 — Comparison of sphingolipid content in wild type, pam16-I61N, sur4 Δ and pam16-I61N sur4 Δ strains. The sphingolipid content of strains growing in logarithmic phase at 34°C were measured by mass spectrometry. The quantity of each sphingolipid was normalized to organic phosphate. The values shown are the means ± SEM (pmole sphingolipid/nmole phosphate). n = 3. Abbreviations: αOH, alpha-hydroxy; Cer, ceramide; dh, dihydro; Sph, sphingosine; P, phosphate. (XLSX) [file pone.0039428.s008.xlsx]

## Sheet: Sheet1
Table S1. Comparison of sphingolipid content in wild type, pam16-I61N, sur4∆ and pam16-I61N sur4∆ strains
			pmole sphingolipid/nmole phosphate
	wild type		pam16-I61N		sur4∆		pam16-I61N sur4∆
	mean	sem	mean	sem	mean	sem	mean	sem
αOH-PhytoC16-Cer	0.00409244	0.0017	0.0307081	0.0114862	0.00674126	0.00455039	0.0116429	0.00386951
αOH-PhytoC18-Cer	0.00164814	0.000598447	0.0225089	0.00905593	0.00300159	0.00145266	0.00371084	0.00232391
αOH-PhytoC18:1-Cer	0.0111075	0.0100739	0.00870519	0.00460323	0.0783821	0.0416535	0.0663419	0.0449616
αOH-PhytoC20-Cer	0.0125407	0.00979554	0.0337921	0.0119656	0.0361147	0.0184566	0.0735156	0.0469951
αOH-PhytoC20:1-Cer	0.0352973	0.0229574	0.0206543	0.0122562	0.205896	0.093512	0.220026	0.165875
αOH-PhytoC22-Cer	0.0191782	0.0115462	0.0260989	0.0113612	0.279394	0.125834	0.467922	0.272001
αOH-PhytoC22:1-Cer	0.00586036	0.00409123	0.000931321	7.59062e-05	0.00183503	0.00169604	0.00432013	0.00215716
αOH-PhytoC24-Cer	0.538671	0.236278	0.557384	0.178209	0.0529288	0.0250144	0.085318	0.0547752
αOH-PhytoC24:1-Cer	0.00415889	BDL	0.00100152	BDL	0.000385172	BDL	0.000706474	0.00053877
αOH-PhytoC26-Cer	3.95226	1.16932	4.6639	1.19664	0.00632025	0.00287018	0.00438604	0.000807237
αOH-PhytoC26:1-Cer	0.0191424	0.00718581	0.0309472	0.0118527	7.13809e-05	5.59062e-05	0.000294967	0.000188285
αOH-PhytoC28-Cer	0.00980569	0.00565739	0.0213486	0.0106212	9.08876e-05	BDL	0.00135155	BDL
dhC12-Cer	0.00172288	0.00100554	0.000732923	3.45106e-05	0.00229096	0.00117246	0.00172338	0.00114025
dhC14-Cer	0.00169496	0.000828154	0.000911461	0.000498536	0.00296061	0.00211775	0.00196495	0.001463
dhC16-Cer	0.00336407	0.00147753	0.00259071	0.00131687	0.0116741	0.00876005	0.00756786	0.00455125
dhC18-Cer	0.0300069	0.00715046	0.028999	0.0119467	0.0172457	0.00733493	0.0129637	0.00422617
dhC18:1-Cer	0.00443087	0.000808869	0.00752622	0.00321523	0.00954273	0.0031945	0.00802185	0.00255323
dhC20-Cer	0.0606904	0.0172475	0.0720208	0.0354521	0.0170002	0.00489104	0.0121319	0.00287693
dhC20:1-Cer	0.008991	0.00280715	0.0147441	0.00711978	0.00510677	0.00174802	0.00592572	0.000977825
dhC22-Cer	0.0049094	0.00196633	0.00416552	0.00190392	0.00830237	0.00469851	0.00524383	0.00362815
dhC22:1-Cer	0.00223412	0.00109101	0.00116156	5.30164e-05	0.000571338	1.74332e-05	0.000459636	2.71954e-05
dhC24-Cer	0.0292082	0.0241726	0.00942426	0.00773718	0.00579912	0.00378518	0.00389904	0.00293
dhC24:1-Cer	0.000171487	7.99817e-05	0.000206537	9.35756e-05	0.000133588	4.9333e-05	0.000156082	6.37975e-05
dhC26-Cer	0.0350354	0.0301975	0.0130973	0.00782965	0.00107467	0.000551853	0.00102852	0.000675537
dhC26:1-Cer	0.000294546	0.000189954	0.000209932	7.69484e-05	5.63071e-05	1.31775e-05	5.81329e-05	2.64728e-05
dhSph	1.29656	0.503193	1.23583	0.433719	3.45994	1.12477	2.64301	0.930007
dhSph-1P	0.0174628	0.00891187	0.0498502	0.031724	1.51955	0.453522	2.72642	1.31914
Phyto-Sph	2.32852	1.80748	2.53458	1.8999	78.0517	53.9142	85.8758	64.3341
Phyto-Sph-1P	0.109027	0.103967	0.141179	0.135326	16.9417	16.0097	43.9476	43.1232
PhytoC14-Cer	0.00193762	0.00176103	0.00851107	0.0080121	0.0062507	0.00343523	0.00642643	0.00556017
PhytoC16-Cer	0.0150899	0.0118211	0.0329173	0.0185231	0.015671	0.0054333	0.0160997	0.00660689
PhytoC18-Cer	0.0252486	0.00748615	0.0169554	0.00727788	0.00941134	0.00309565	0.0108052	0.00252829
PhytoC18:1-Cer	0.00313831	0.00214988	0.00310489	0.00248111	0.00828857	0.0026402	0.00837924	0.00421294
PhytoC20-Cer	0.0310549	0.00958685	0.0185836	0.00695911	0.0227899	0.00132558	0.0354133	0.0134596
PhytoC20:1-Cer	0.0310048	0.023426	0.0134682	0.00556696	0.0061081	0.00111549	0.0190327	0.0077007
PhytoC22-Cer	0.0154613	0.00732882	0.00518179	0.00260815	0.103399	0.0411652	0.109899	0.0187763
PhytoC22:1-Cer	0.00237255	0.000821683	0.00055406	0.000328585	0.00229673	0.0011293	0.00735991	0.00414157
PhytoC24-Cer	0.155489	0.0709626	0.0597813	0.0254586	0.013753	0.00772846	0.0210315	0.00469791
PhytoC24:1-Cer	0.0202373	0.0100407	0.0326616	0.0173107	0.00536392	0.00379808	0.00661774	0.00177235
PhytoC26-Cer	1.38662	0.61676	0.49694	0.188944	0.0023922	0.00174839	0.00271884	0.00131723
PhytoC26:1-Cer	0.0966315	0.0479546	0.122069	0.0704086	0.000513727	0.000175885	0.000955803	0.000674536
PhytoC28-Cer	0.00215943	0.00174705	0.00131039	BDL	0.000820047	BDL	0.000148184	0.000113681
PhytoC28:1-Cer	0.000700276	0.000458684	0.000188531	0.000108748	9.89117e-05	6.4768e-05	1.73606e-05	2.74241e-06
